# Supplementary material
Source: Springer Nature journal article supplement (https://www.springermedizin.de/resource/supplementary/12908_2011_122_MOESM8_ESM.pdf/9525188)

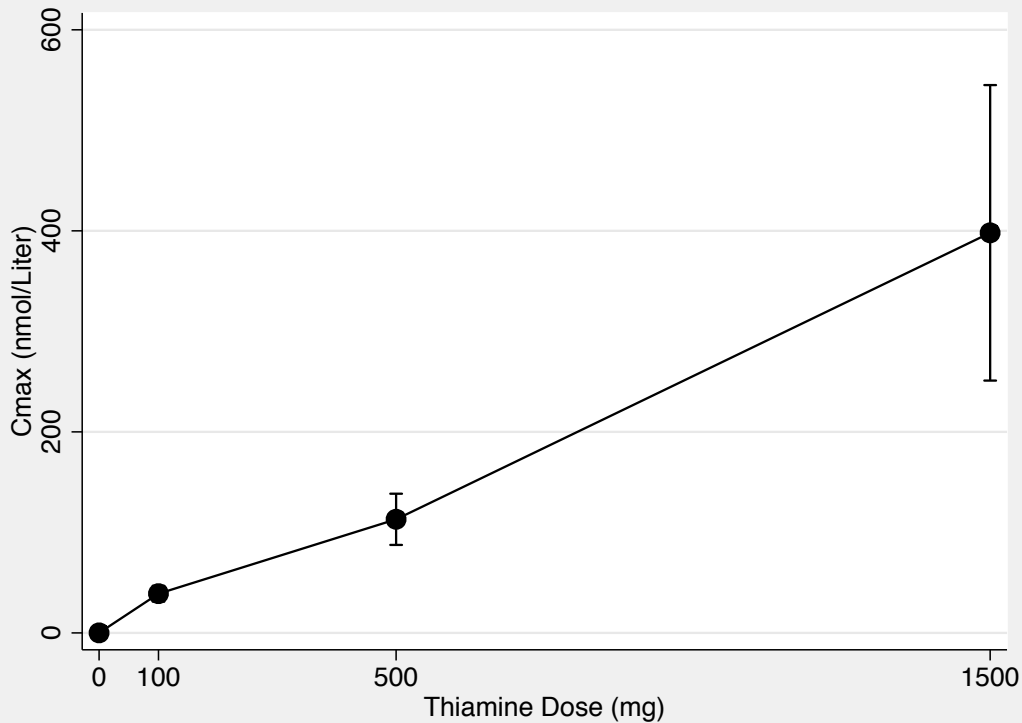

Supplement: MOESM8 [file 9525188]
